# Supplementary material
Source: Springer Nature journal article supplement (https://www.springermedizin.de/resource/supplementary/12889_2008_1369_MOESM3_ESM.pdf/9503052)

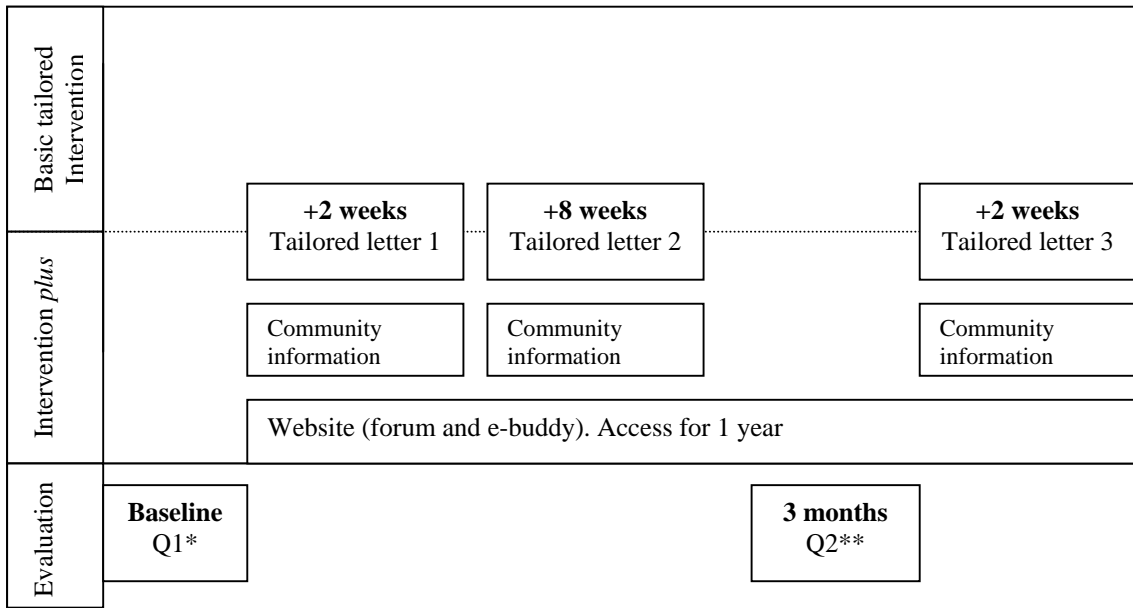

\* Q1= baseline questionnaire

\*\*Q2= three months questionnaire

Supplement: MOESM3 [file 9503052]
